# Supplementary material for: Biological Misinterpretation of Transcriptional Signatures in Tumor Samples Can Unknowingly Undermine Mechanistic Understanding and Faithful Alignment with Preclinical Data
Source: PubMed Central journal article supplement (PMC9475248; doi:10.1158/1078-0432.ccr-22-1102), 2022-07-06
Supplement: ccr-22-1102_supplementary_figure_s1_supps1.pdf [file ccr-22-1102_supplementary_figure_s1_supps1.pdf]

# Supplementary Figure 1

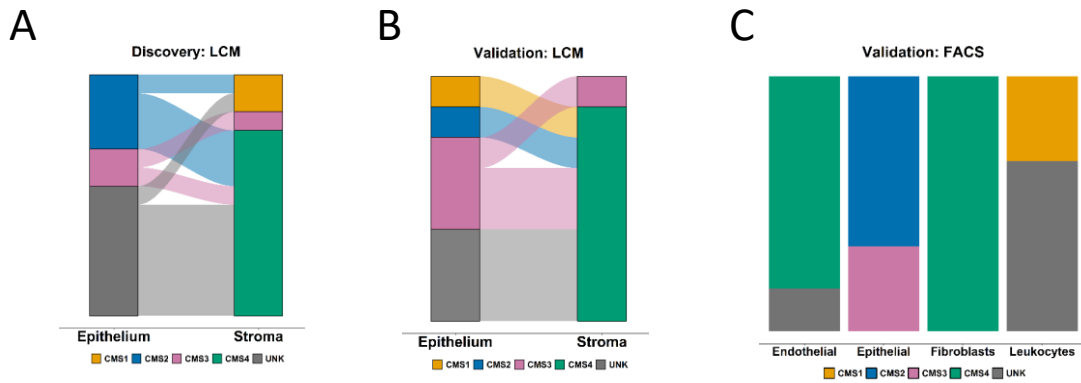

## Supplementary Figure 1

**A** CMS calls (using CMScaller) for the matched epithelium and stroma samples in the LCM discovery cohort. **B** CMS calls (using CMScaller) for the matched epithelium and stroma samples in the LCM validation cohort. **C** CMS calls (using CMScaller) for the four lineages in the FACS validation cohort.
